# Supplementary material for: α-Synuclein enhances histone H3 lysine-9 dimethylation and H3K9me2-dependent transcriptional responses
Source: PubMed Central journal article supplement (PMC5093762; doi:10.1038/srep36328), 2016-11-03
Supplement: srep36328-s1.pdf [file srep36328-s1.pdf]

## SUPPLEMENTARY INFORMATION

### **$\alpha$ -Synuclein enhances histone H3 lysine-9 dimethylation and H3K9me2-dependent transcriptional responses**

Naoto Sugeno, Sandra Jäckel, Aaron Voigt, Zinah Wassouf, Julia Schulze-Hentrich and Philipp Kahle

#### **Supplementary figure legend**

Figure S1. Doxycycline treatment to the parental cells, and inducible mutant  $\alpha$ S cells. Western blots were presented in 'WB' column, and Coomassie Brilliant Blue stained gels after the transfer were shown in 'CBB' column. (a) Parental SH-SY5Y cells were treated with 10 nM RA in medium supplemented with 3% fetal bovine serum for 7 days followed by the addition of doxycycline (Dox). After further incubation for 2 days, histones and TX-soluble fractions were analyzed by Western blotting. No significant changes were observed by Two-way ANOVA (n=3). (b) Inducible A53T mutant  $\alpha$ S expressing cells were treated with 10 nM RA in medium supplemented with 3% fetal bovine serum for 6 days followed by the addition of doxycycline (Dox). After further incubation for 1-3 days, histones and TX-soluble fractions were subjected to Western blotting. After two days induction of  $\alpha$ S, H3K9me2 level was significantly elevated. \* $P$ <0.01 by Sidak after Two-way ANOVA against 0 day; (n=3). The experiments were repeated three times.

# Figure S1

**a**

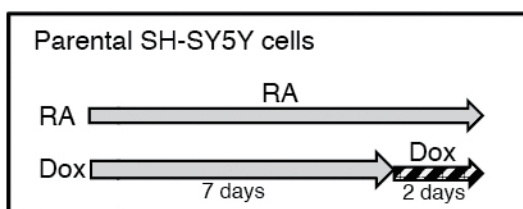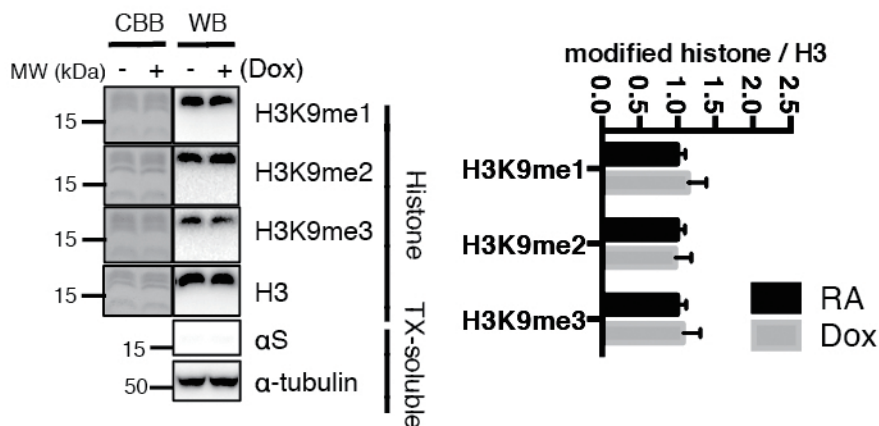

**b**

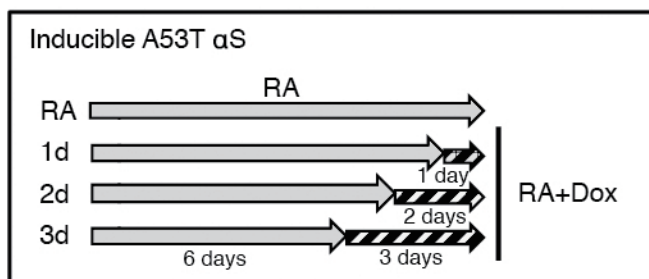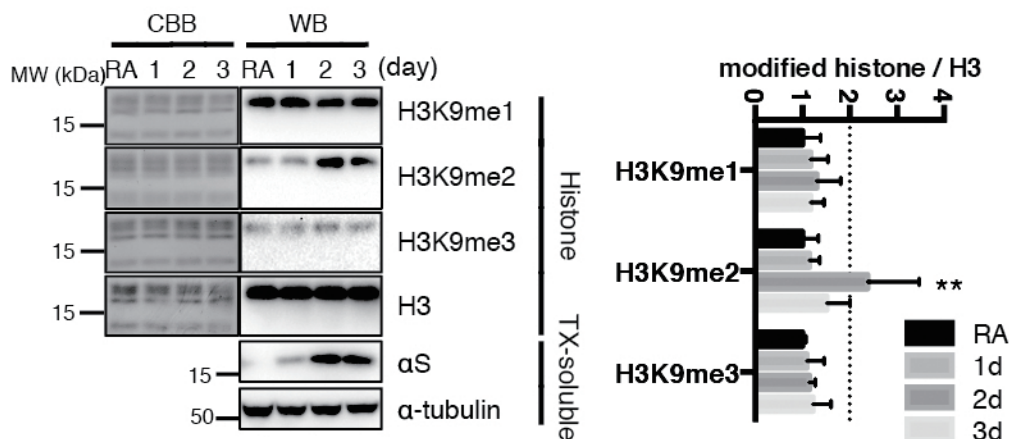

Table. S1

RT-PCR primers

|                |      | Forward       |                    |     | Reverse |                              |     |
|----------------|------|---------------|--------------------|-----|---------|------------------------------|-----|
| KDM1A          | 5' - | atctgcagtc    | caaaggatgg         | -3' | 5' -    | gccaacaatcacatcgtcac         | -3' |
| KDM1B          | 5' - | tacggcaacatgt | ctctgtgt           | -3' | 5' -    | tgggactaggttcggttttg         | -3' |
| KDM3A          | 5' - | gccaacattgg   | agaccactt          | -3' | 5' -    | caccctgttggcaattcttt         | -3' |
| KDM3B          | 5' - | caggaatttg    | agaccagga          | -3' | 5' -    | gccagtccttgagtttgagc         | -3' |
| KDM4A          | 5' - | ttgcttggc     | acactgaagac        | -3' | 5' -    | tcagcattaacggggaaatc         | -3' |
| KDM4B          | 5' - | gcctcagga     | accatcactgt        | -3' | 5' -    | ccctgcgactctatgtaggc         | -3' |
| KDM4C          | 5' - | gcttgcgaga    | aggtcatttc         | -3' | 5' -    | gacttctccctcagcaggtg         | -3' |
| KDM4D          | 5' - | aaatatgtac    | ggggcaacca         | -3' | 5' -    | tactcagacctgggggtacg         | -3' |
| KDM6A          | 5' - | ctactgga      | agaatgctgcct       | -3' | 5' -    | ctgaaaatgctttaaactag         | -3' |
| KDM6B          | 5' - | cagcatctat    | ctggagagca         | -3' | 5' -    | gcctgtcagatcccagttct         | -3' |
| KDM7A          | 5' - | ccccatacc     | attcccgaaga        | -3' | 5' -    | actgtggaggatggttgag          | -3' |
| PHF8           | 5' - | tggatgaac     | agagcagcttg        | -3' | 5' -    | gcagccaaacctgtctcaat         | -3' |
| PHF2           | 5' - | tacgacgt      | taccgcttcat        | -3' | 5' -    | ccaggctcgttcttcttta          | -3' |
| SUV39H1        | 5' - | gctatgact     | gccccaaatcgt       | -3' | 5' -    | acacgtcctccacgtagtcc         | -3' |
| SUV39H2        | 5' - | ggtgtgtgc     | cttgccctagtt       | -3' | 5' -    | aacgggcacttcagattttg         | -3' |
| EHMT2          | 5' - | aggggtgt      | ccaatgacacat       | -3' | 5' -    | tctcacagagcaccatcagg         | -3' |
| EHMT1          | 5' - | gggaagga      | aaccttgagag        | -3' | 5' -    | ggagagcgcttattctggtg         | -3' |
| SETDB1         | 5' - | agacatct      | cctgccgtgact       | -3' | 5' -    | gccgtgtagagcctcgatag         | -3' |
| SETDB2         | 5' - | gagtgga       | atcagtgccatt       | -3' | 5' -    | ttgacaagggggaagttttg         | -3' |
| EZH2           | 5' - | gaagtaa       | agagtatgtttag      | -3' | 5' -    | catcttccaccataaaattc         | -3' |
| EZH1           | 5' - | tccttcacc     | cttttcatgcc        | -3' | 5' -    | actatgtggtgccttctccg         | -3' |
| PRDM2          | 5' - | gcttttcc      | cttctgctgttg       | -3' | 5' -    | aatgcacatccatcccaat          | -3' |
| REST&REST4     | 5' - | gagcgagt      | atcactggaggaacattt | -3' | 5' -    | atagtcacatacagggcaattgaactgc | -3' |
| $\beta$ -actin | 5' - | ggacttcg      | agcaagagatgg       | -3' | 5' -    | agcactgtggtggcgtag           | -3' |

Table. S2

## ChIP-qPCR primers

|          | <b>Forward</b> |                           | <b>Reverse</b> |                              |     |
|----------|----------------|---------------------------|----------------|------------------------------|-----|
| BDNF     | 5' -           | GTAAGCCAACCTGTGTCG        | -3'            | 5' - TCCGCTCCAAAATCTGACTC    | -3' |
| CHRM4    | 5' -           | AGACAAGCGCTGGAGCGGAATCA   | -3'            | 5' - AATCTCAGAGGTGCTGGGAAC   | -3' |
| GRIK4    | 5' -           | AGTCAGTATGGACATAATAGCAGGT | -3'            | 5' - TTTAAAGCAGGGGAACATCTCT  | -3' |
| GRIN1    | 5' -           | TGCGACCCCAAGATCGTCAA      | -3'            | 5' - CTTGTTGGCCTGGTTCACGG    | -3' |
| GRIN2A   | 5' -           | GTCTCCCCACTTGGAAATTGA     | -3'            | 5' - AGTCCTTTGATCCGTGCTGT    | -3' |
| L1CAM    | 5' -           | GATAGCCAGGACGTTGGGTA      | -3'            | 5' - TGTCCCTGGTGTGAAATCG     | -3' |
| NEFH     | 5' -           | CTCCCTTCCCTCCCTAAAG       | -3'            | 5' - TGGCTCATGTTTTATGCTGTG   | -3' |
| NTRK3    | 5' -           | GCTCACCTTCCCTAGCATTG      | -3'            | 5' - CAAGGCAGTGGCATTCGCT     | -3' |
| NPTXR    | 5' -           | GCCCAGAGGTAGAGGGGATA      | -3'            | 5' - GTGCCACCCTTGTTTTG       | -3' |
| NRXN3    | 5' -           | TTATTTCCCTTTCCTTGG        | -3'            | 5' - AACCTTTTCCATCCTCCAG     | -3' |
| P2RY4    | 5' -           | CTCCAAAGCCACCCACTACT      | -3'            | 5' - TCATCCACATCCCACTTGAA    | -3' |
| SCN2A    | 5' -           | AGCACCATGGACAGCGTTAC      | -3'            | 5' - CAGTTGTGAAGGCCAGGATCA   | -3' |
| SNAP25   | 5' -           | GGGTGCTATTATCCAGGGAAG     | -3'            | 5' - CAGGCGGCATAAATCAAGTC    | -3' |
| SNAP25   | 5' -           | AGTGGTTGTCGTGAGACCTA      | -3'            | 5' - CCCTGGAATCTGGTATGGC     | -3' |
| SYN1     | 5' -           | GGTGCTGAAGCTGGCAGT        | -3'            | 5' - TGGGTTTTAGGACCAGGATG    | -3' |
| STMN2    | 5' -           | AAGGAGAGTGCCCTGCTATT      | -3'            | 5' - TAGCAGCTTCTGTCCAATCACA  | -3' |
| TUBB3    | 5' -           | GGAGCCTTGTCTCCGC          | -3'            | 5' - CGCAGGTCTTTCAGGCGAG     | -3' |
| KIF5C    | 5' -           | AAGCCCTTGACAGATCCAGT      | -3'            | 5' - TTGGTTGACGTGCAGCAAAT    | -3' |
| MAMDC2   | 5' -           | AATGGCATTGCTCCCGTGT       | -3'            | 5' - ACGGAGACAGAGAGTAGGGTG   | -3' |
| COL23A1  | 5' -           | CCATAGAGTGTTACCTGAGCGT    | -3'            | 5' - AACAGAAACATTCATGGCCC    | -3' |
| DHFR     | 5' -           | CCTAGGGTTCGTCAAGTTCGTG    | -3'            | 5' - AAAACACTCTTTACGCCGGT    | -3' |
| MTRNR2L8 | 5' -           | TACTACCGAACAGCTTTAACCAAAT | -3'            | 5' - CTTGCTGTATTATGCTTGGTTGC | -3' |
| CRH      | 5' -           | ATGAGCTTAGGTGCGGAGC       | -3'            | 5' - CTACGGGACTGCCTTAGACG    | -3' |
| CALB1    | 5' -           | CTTTTGCTCACTCCCCCTCG      | -3'            | 5' - AATCACCGTCAGCGTCGAAA    | -3' |
| SST      | 5' -           | GATAAGCGCAGTCGGTCACA      | -3'            | 5' - GCTTCGTGCCAGACAATA      | -3' |
| ATP2B2   | 5' -           | ACATCCTGCTCTGTGTCAGC      | -3'            | 5' - TCAAGGGCACAGTGCTGATT    | -3' |
| DAXX     | 5' -           | CTTTTATGGCGCGTTGTGCT      | -3'            | 5' - TTTCCACGGCTTATTCGGCT    | -3' |
| SCN3B    | 5' -           | GAGAAGCAGTTAGGGCGGAC      | -3'            | 5' - GGTGATTACCTCTCGCCT      | -3' |
| HTR1A    | 5' -           | AGGTGGCGACATAAAACCTCA     | -3'            | 5' - CTTGGTGAATCCCGGTTTCG    | -3' |
| SLC39A3  | 5' -           | ATCTGCTTCTTCAGCCGTCG      | -3'            | 5' - AAGGGATTTCCAACGGAGGC    | -3' |
| GAPDH    | 5' -           | GAAAGCAATCCCAGAAAGG       | -3'            | 5' - TCTAGCTAAAAGCCGGTTGC    | -3' |

Table. S3

RT-qPCR primers

|         |      | <b>Forward</b>           |     | <b>Reverse</b> |                            |
|---------|------|--------------------------|-----|----------------|----------------------------|
| CALB1   | 5' - | TTTCGACGCTGACGGAAGT      | -3' | 5' -           | TCTTTGCCCATACTGATCCACA -3' |
| SLC39A3 | 5' - | AGGGAAAAGCTCCAGAAGGTC    | -3' | 5' -           | CTCCAGGTCGATGAAGGACG -3'   |
| GRIN2A  | 5' - | GCACACCTTGACCCATTTAT     | -3' | 5' -           | TCAGGCTCAGCGTATGGTTC -3'   |
| NTRK3   | 5' - | ATGGAGCTCTACACCGGACT     | -3' | 5' -           | GGTGAGCCGGTTACTTGACA -3'   |
| NEFH    | 5' - | CTGAGGAACACCAAGTGGGAG    | -3' | 5' -           | GGAATTGGGCCAAAGCCAATC -3'  |
| SYN1    | 5' - | TTTGCCCGATGGTTCGACT      | -3' | 5' -           | CAACCTTGACCTTGCCCATC -3'   |
| CRH     | 5' - | TGGGAAGCGAGTGCCCTA       | -3' | 5' -           | GAAATCCAAGGGCTGAGGGTG -3'  |
| L1CAM   | 5' - | GCGGCAAATACTCAGTGAAGG    | -3' | 5' -           | GGACCTGTACTCGCCGAAG -3'    |
| SNAP25  | 5' - | CAGTTGGCTGATGAGTCGCT     | -3' | 5' -           | TTCATGCCTTCTTCGACACGA -3'  |
| REST    | 5' - | GAACTCATACAGGAGAACGCC    | -3' | 5' -           | TGTCTTGCATGGCGGGTTAC -3'   |
| SNCA    | 5' - | AAATGTTGGAGGAGCAGTGG     | -3' | 5' -           | TCCAGAATTCCTTCCTGTGG -3'   |
| GAPDH   | 5' - | CGGTTTCTATAAAATTGAGCCCGC | -3' | 5' -           | TGGCTCGGCTGGCGAC -3'       |
